# Supplementary material
Source: Springer Nature journal article supplement (https://www.springermedizin.de/resource/supplementary/13046_2012_628_MOESM1_ESM.pdf/9662600)
Supplement: MOESM1 [file 9662600]

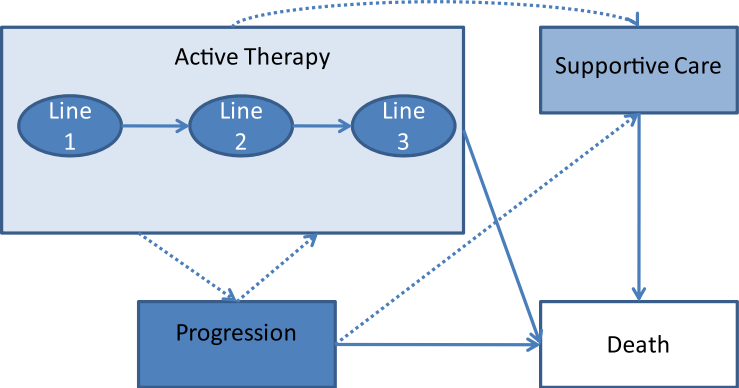

- Up to three lines of active therapy recorded per individual
- At any point, disease progression may occur
  - Some individuals return to a subsequent line of active therapy following progression
- From active therapy or progression, individuals can transition to supportive care
  - Assumption that no return to active therapy following initiation of supportive care
